# Supplementary material for: Hollow polyhedral ZnCo2O4 superstructure as an ethanol gas sensor and sensing mechanism study using near ambient pressure XPS
Source: Royal Society of Chemistry journal article supplement (doi:10.1039/d1tc03450b), 2021-01-01
Supplement: d1tc03450b1.pdf [file d1tc03450b1.pdf]

## **Hollowed polyhedron assembled from ZnCo<sub>2</sub>O<sub>4</sub> nanoparticles for ethanol sensor and sensing mechanism by near ambient pressure XPS**

Guotao Yuan<sup>1</sup>, Hui Zhang<sup>2,3</sup>, Yufeng Cheng<sup>1</sup>, Yihong Zhong<sup>1</sup>, Qiqi Zhuo<sup>4,\*</sup> & Xuhui Sun<sup>1,\*</sup>

<sup>1</sup>Institute of Functional Nano and Soft Materials Laboratory (FUNSOM), Soochow University, Suzhou 215123, China

<sup>2</sup>State Key Laboratory of Functional Materials for Informatics, Shanghai Institute of Microsystem and Information Technology, Chinese Academy of Sciences, Shanghai 200050, China

<sup>3</sup>CAS Center for Excellence in Superconducting Electronics (CENSE), 865 Changning Road, Shanghai 200050, China

<sup>4</sup>College of Material Science & Engineering, Jiangsu University of Science and Technology, Zhenjiang, China

\* Corresponding authors: E-mail [xhsun@suda.edu.cn](mailto:xhsun@suda.edu.cn); [zqq88263268@126.com](mailto:zqq88263268@126.com).

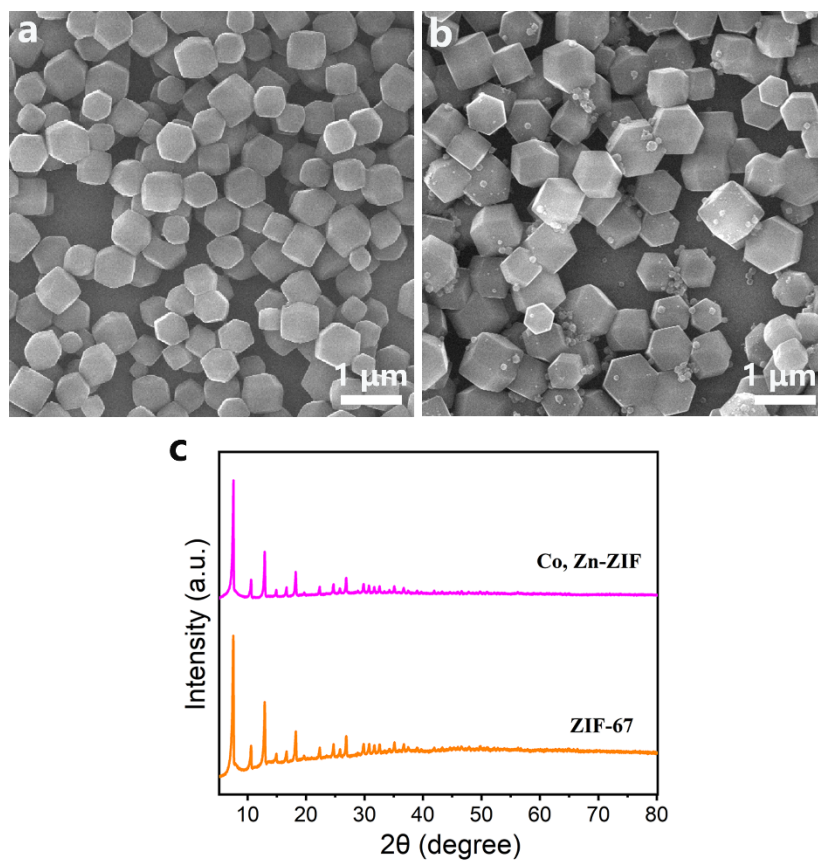

**Figure S1** the SEM images of (a) ZIF-67 and (b) Co, Zn-ZIF; (c) XRD patterns of ZIF-67 and Co, Zn-ZIF

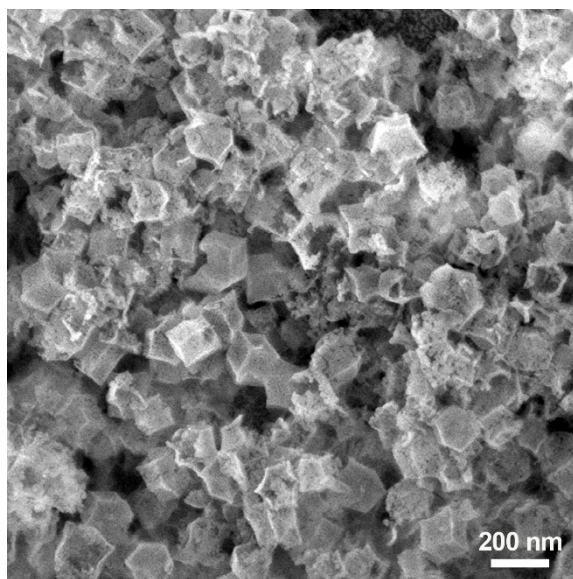

**Figure S2** The SEM image of as-prepared ZnO nanoparticles

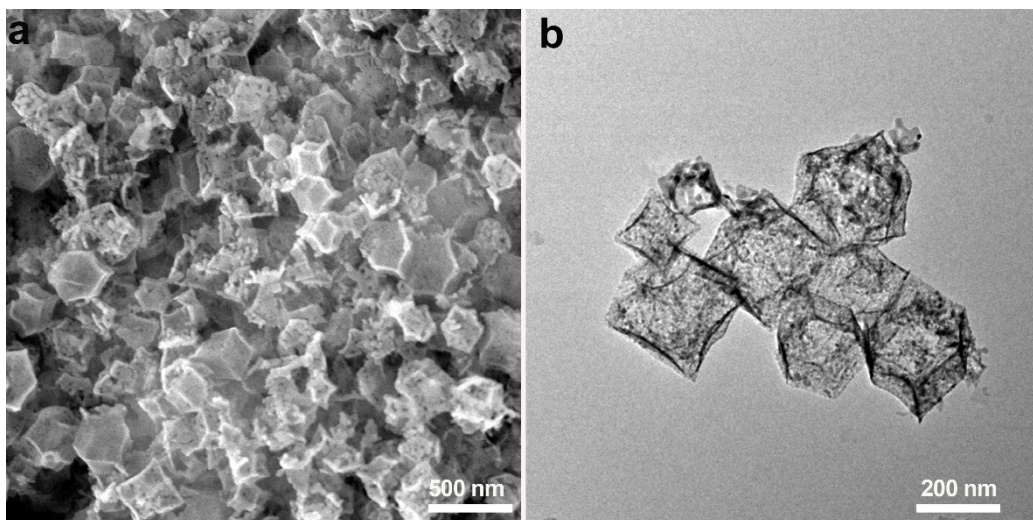

**Figure S3** the SEM (a) and TEM (b) images of ZIF-67 derived  $\text{Co}_3\text{O}_4$  nanoparticles.

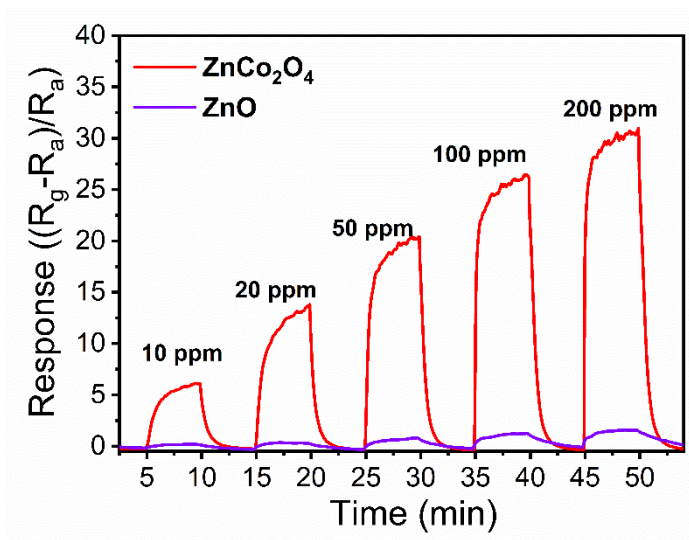

**Figure S4** the response curves of ZIF-8 derived ZnO and ZnCo<sub>2</sub>O<sub>4</sub> HP versus time at 200 °C.

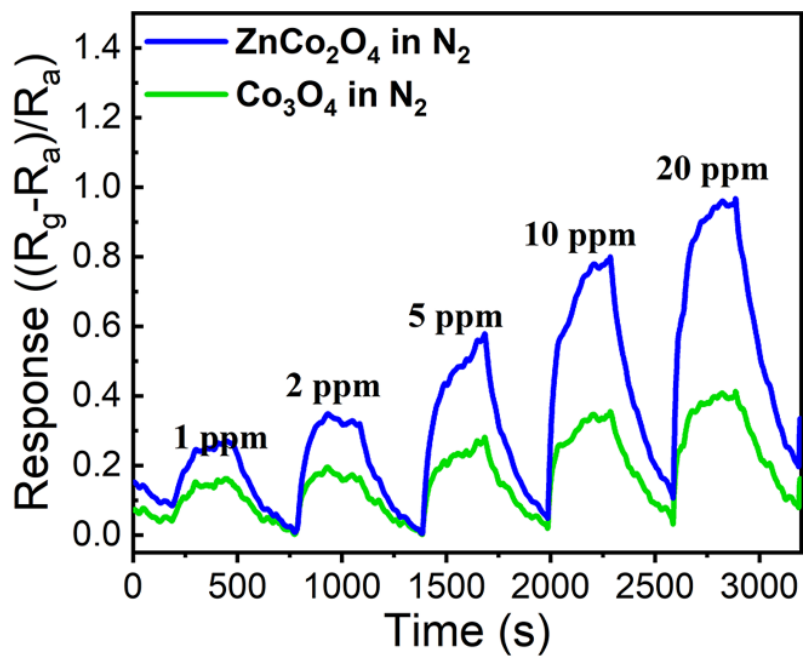

**Figure S5** The response curves of porous Co<sub>3</sub>O<sub>4</sub> and ZnCo<sub>2</sub>O<sub>4</sub> HP at concentrations of ethanol ranging from 1 ppm to 20 ppm in N<sub>2</sub> at 200 °C.

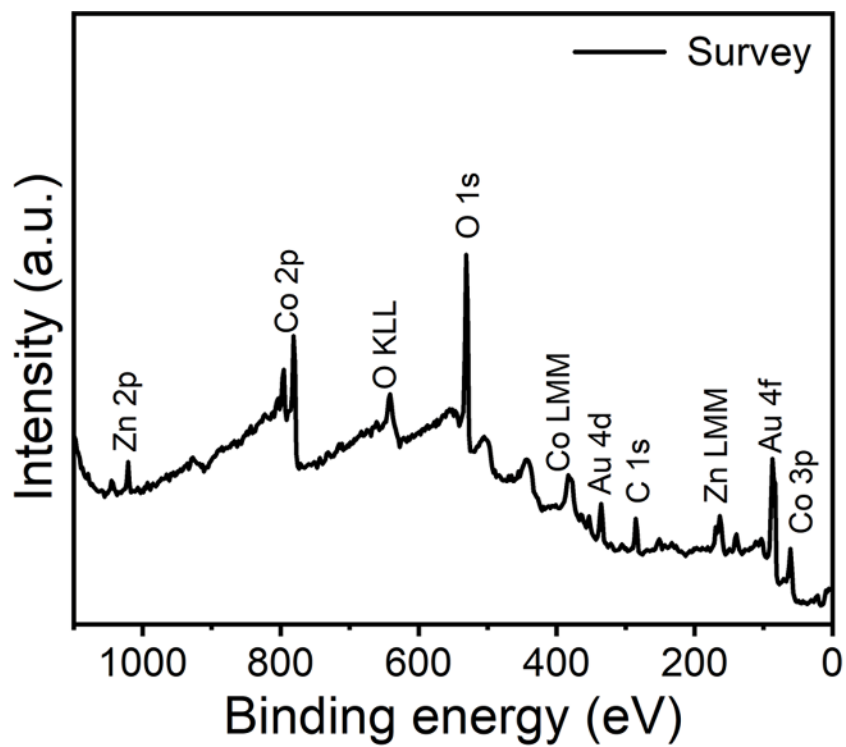

**Figure S6** XPS survey of  $\text{ZnCo}_2\text{O}_4$  HP at room temperature under UHV condition

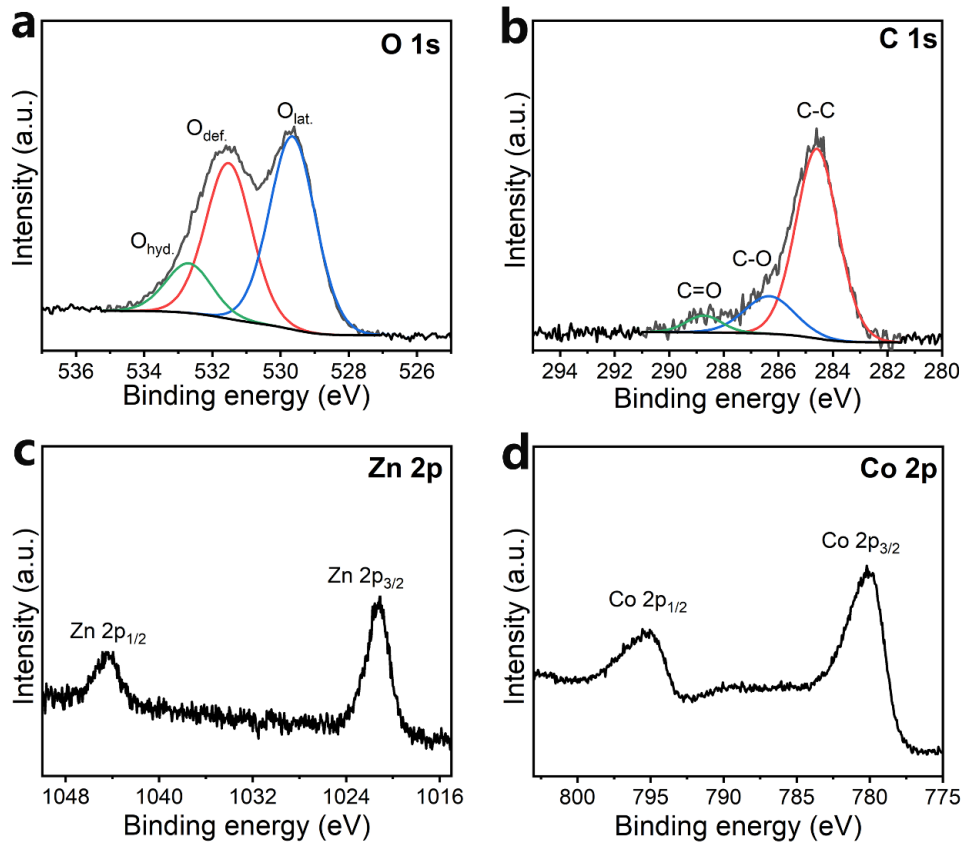

**Figure S7** (a) O 1s, (b) C 1s, (c) Zn 2p and (d) Co 2p XPS spectra taken from the  $ZnCo_2O_4$  HP sensor at room temperature under UHV condition, respectively.



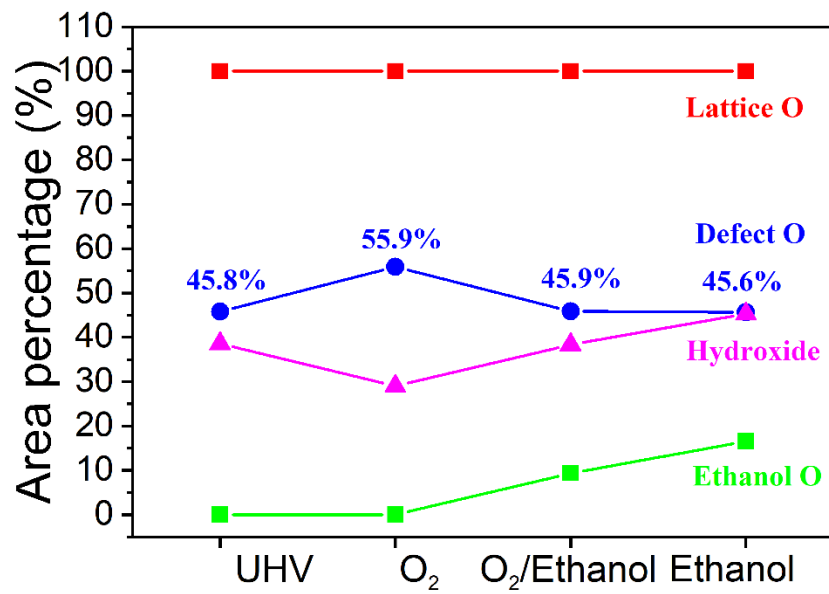

**Figure S8** Scatter plots of area percentage of different oxygen species (set the percentage of lattice O as 100%).

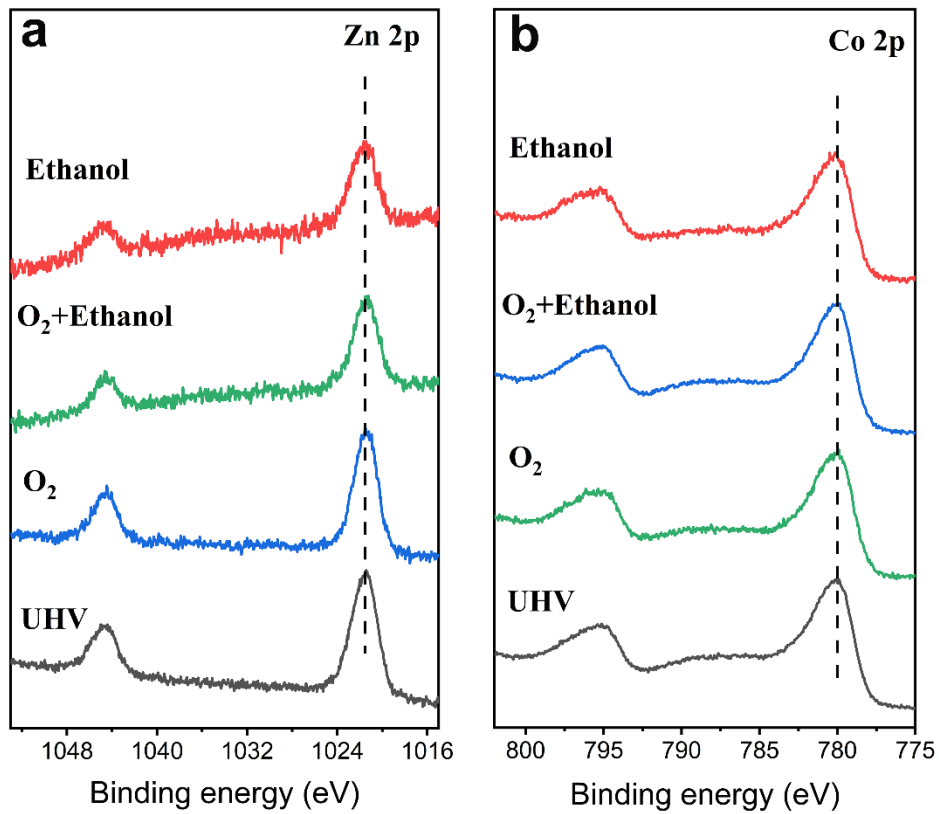

**Figure S9** (a) Zn 2p and (b) Co 2p APXPS spectra taken from the ZnCo<sub>2</sub>O<sub>4</sub> HP sensor exposed to different analytes at 200 °C.

**Table S1** the fitting parameters of O 1s spectra.

| <b>Working condition</b>     | <b>Position</b> | <b>FWHM</b> | <b>Area</b> | <b>%Area</b> |
|------------------------------|-----------------|-------------|-------------|--------------|
| <b>O<sub>2</sub>/ethanol</b> | 529.7           | 1.54        | 21803.8     | 51.69        |
|                              | 531.5           | 1.54        | 10069.7     | 23.83        |
|                              | 532.3           | 1.54        | 8331.1      | 19.71        |
|                              | 533.7           | 1.54        | 2020.4      | 4.77         |
| <b>Ethanol</b>               | 529.7           | 1.54        | 22412.9     | 48.29        |
|                              | 531.7           | 1.54        | 10280.8     | 22.11        |
|                              | 532.5           | 1.54        | 10064.8     | 21.64        |
|                              | 534.1           | 1.54        | 3708.4      | 7.96         |
| <b>O<sub>2</sub></b>         | 529.7           | 1.57        | 39478.6     | 54.24        |
|                              | 531.8           | 1.57        | 18186.3     | 24.94        |
|                              | 532.6           | 1.57        | 15184.7     | 20.81        |
| <b>UHV</b>                   | 529.7           | 1.58        | 47221.9     | 55.43        |
|                              | 531.7           | 1.58        | 21315.5     | 24.98        |
|                              | 532.6           | 1.58        | 16721.9     | 19.58        |
